# Supplementary material for: Antipsychotic Formulation and One-Year Rehospitalization of Schizophrenia Patients: A Population-Based Cohort Study
Source: Atypon-hosted journal article supplement (doi:10.1176/appi.ps.201200506), 2013-12-01
Supplement: 1259_ds001.pdf [file 1259_ds001.pdf]

Table. Clinical characteristics of the schizophrenia patients

| (2003-2008) ICD-9 code 295            | schizophrenia<br>(n=14,610) |             |
|---------------------------------------|-----------------------------|-------------|
|                                       | n                           | %           |
| Age, year(mean±S.D)                   | 38.35(mean)                 | 12.80(S.D.) |
| 0-19                                  | 596                         | 4.1         |
| 20-39                                 | 7602                        | 52.0        |
| 40-59                                 | 5535                        | 37.9        |
| >60                                   | 877                         | 6.0         |
| Gender                                |                             |             |
| female                                | 6579                        | 45.2        |
| male                                  | 7988                        | 54.8        |
| Urbanicity                            |                             |             |
| urban                                 | 7535                        | 51.8        |
| suburban                              | 2522                        | 17.3        |
| rural                                 | 4499                        | 30.9        |
| Region                                |                             |             |
| northern                              | 6377                        | 43.8        |
| central                               | 2906                        | 20.0        |
| southern                              | 4606                        | 31.6        |
| eastern                               | 667                         | 4.6         |
| Insurance payment/ year (U.S. dollar) |                             |             |
| 0                                     | 2752                        | 18.9        |
| <620.73                               | 8744                        | 60.1        |
| 620.73~1241.46                        | 2941                        | 20.2        |
| >1241.46                              | 119                         | .8          |

---

Table. Usage of antipsychotics among the schizophrenia patients

---

| (2003-2008) ICD-9 code 295 (N=10,552)            | Schizophrenia patients |      |
|--------------------------------------------------|------------------------|------|
|                                                  | n                      | %    |
| Oral                                             | 9553                   | 90.5 |
| First generation antipsychotics                  | 3251                   | 30.8 |
| Risperidone                                      | 2596                   | 24.6 |
| Non-risperidone second generation antipsychotics | 3706                   | 35.1 |
| LAI                                              | 999                    | 9.5  |
| Haloperidol                                      | 236                    | 2.2  |
| Flupenthixol                                     | 556                    | 5.3  |
| Risperidone                                      | 207                    | 2.0  |

---

Table .Cox regression model results for schizophrenia patients with rehospitalization

| variable                                     | Hazard ratio | 95% CI     | <i>p-value</i> |
|----------------------------------------------|--------------|------------|----------------|
| <b>Age</b>                                   |              |            |                |
| 0-19                                         | 1.00         | -----      |                |
| 20-39                                        | .83          | .70 -.99   | <.05           |
| 40-59                                        | .66          | .55 -.79   | <.001          |
| >60                                          | .55          | .43 -.71   | <.001          |
| <b>Gender</b>                                |              |            |                |
| Female                                       | 1.00         | -----      |                |
| Male                                         | 1.03         | .95 -1.11  | .490           |
| <b>Region</b>                                |              |            |                |
| northern                                     | 1.00         | -----      |                |
| central                                      | 1.07         | .97 -1.19  | .175           |
| southern                                     | 1.25         | 1.15 -1.36 | <.001          |
| eastern                                      | 1.25         | 1.04 -1.50 | <.05           |
| <b>Insurance payment/ year (U.S. dollar)</b> |              |            |                |
| 0                                            | 1.00         | -----      |                |
| <620.73                                      | .96          | .87 -1.07  | .474           |
| 620.73~1241.46                               | .84          | .74 -.94   | <.05           |
| >1241.46                                     | .44          | .26 -.77   | <.05           |
| <b>Comorbidity</b>                           |              |            |                |
| Hypertension                                 | 1.05         | .83 -1.34  | .690           |
| Diabetes Mellitus                            | 1.14         | .96 -1.34  | .128           |
| Cardiovascular disease                       | 1.18         | .96 -1.45  | .127           |
| Chronic kidney disease                       | 1.01         | .42 -2.45  | .979           |
| <b>Outpatient form</b>                       |              |            |                |
| Outpatient care                              | 1.00         | -----      |                |
| Additional outpatient care*                  | .91          | .82 -1.02  | .100           |

\*Additional outpatient care included day hospital, rehabilitation center, or home care services
